# Supplementary material for: Additive Effects of Millimeter Waves and 2-Deoxyglucose Co-Exposure on the Human Keratinocyte Transcriptome
Source: PLoS One. 2016 Aug 16;11(8):e0160810. doi: 10.1371/journal.pone.0160810 (PMC4986955; doi:10.1371/journal.pone.0160810)
Supplement: S4 Table — (XLS) [file pone.0160810.s005.xls]

## Sheet: MF
Category	Term	Count	%	PValue	Genes	List Total	Pop Hits	Pop Total	Fold Enrichment	Bonferroni	Benjamini	FDR
GOTERM_MF_FAT	GO:0003677~DNA binding	116	22.137404580152673	2.7419532514659914E-13	ZNF584, FOXO1, MXI1, PNN, HOXC6, HOXC8, ZNF302, TIGD2, H2AFX, PITX2, RREB1, ZNF814, ZNF189, TRERF1, AHR, DDIT3, ZNF234, ZNF789, HES5, HUWE1, ABT1, JUN, ZGLP1, ZNF239, MNT, TGIF1, ZNF844, HIST1H4L, HMGB3, ZSCAN5A, SOX4, MYBL1, OBFC2A, SOX9, ZNF616, HOXA3, ZNF226, CENPBD1, ZNF697, HOXA7, ZNF425, BHLHE40, SKIL, THAP10, RUNX1, KLF5, KLF6, MAFF, ZBTB47, KLF7, SMAD7, KLF10, KLF11, JRKL, ARID3B, HNRNPA1…	336	2331	12983	1.9228769585912444	1.3875789406370131E-10	1.3875789406370131E-10	3.95561361443697E-10
GOTERM_MF_FAT	GO:0030528~transcription regulator activity	80	15.267175572519085	4.0768578997027524E-10	BACH1, E2F2, FOSL2, E2F7, CBX4, FOXO1, MXI1, CBFA2T2, ZKSCAN2, ZKSCAN4, HOXC6, GTF2E1, HOXC8, SIK1, NRG1, NFIL3, SERTAD2, PITX2, RREB1, OTX1, ZNF189, MXD1, TRERF1, PPARGC1B, AHR, DDIT3, PURB, PURA, NRIP1, HES5, ABT1, BTG1, JUN, HIPK2, ZGLP1, ASH1L, MNT, TGIF1, CRTC1, ZSCAN5A, SOX4, FHL2, NFYA, MYBL1, SOX9, ZNF174, ZNF169, TSC22D3, HOXA3, TSC22D2, REL, HEXIM1, XBP1, BCL11A, HOXA7, GATAD2B, BHLHE40…	336	1512	12983	2.0444381456286216	2.0628898045327304E-7	1.0314449550019589E-7	5.880690490123186E-7
GOTERM_MF_FAT	GO:0003700~transcription factor activity	56	10.687022900763358	2.5295557356566187E-8	BACH1, E2F2, FOSL2, E2F7, FOXO1, CBFA2T2, ZKSCAN2, ZKSCAN4, HOXC6, HOXC8, NFIL3, PITX2, OTX1, ZNF189, MXD1, TRERF1, DDIT3, PURB, AHR, PURA, JUN, ZGLP1, MNT, TGIF1, ZSCAN5A, SOX4, NFYA, SOX9, ZNF174, ZNF169, TSC22D3, HOXA3, TSC22D2, REL, XBP1, HOXA7, GATAD2B, BHLHE40, RUNX1, ZBTB7B, KLF5, MAFF, KLF6, FOXL2, KLF7, CEBPB, TBX3, SMAD7, KLF10, KLF11, ZNF165, DLX1, HOXB2, IRF6, TCF19, KLF4	336	975	12983	2.2193162393162393	1.2799470249569289E-5	4.266508286221438E-6	3.648773814202144E-5
GOTERM_MF_FAT	GO:0008270~zinc ion binding	99	18.893129770992367	1.3094251941035306E-7	S100A3, ZNF584, ZC3HAV1, PLEKHM1, LNX2, MMP3, MMP1, ZNF828, GTF2E1, ZNF302, RREB1, ZNF814, ZNF189, TRERF1, ZNF234, ZNF789, ZGLP1, ZNF239, ADAMTS1, ZNF844, ELAC1, ZC3H4, ZSCAN5A, DIDO1, ZNF616, ZNF226, SLC30A1, ZNF697, DMD, ZNF425, THAP10, KLF5, KLF6, ZMYM2, ZBTB47, KLF7, KLF10, KLF11, ZMYM5, ZBTB43, DDX58, CBLB, HIVEP1, TCF19, KLF4, RAI1, ZNF518B, ZNF12, ZKSCAN2, CBFA2T2, ZKSCAN4, ZNF682, NEURL1B…	336	2311	12983	1.6552783272547444	6.62547242045175E-5	1.6564092600312996E-5	1.888787391046698E-4
GOTERM_MF_FAT	GO:0046914~transition metal ion binding	111	21.183206106870227	6.609209279288326E-7	S100A3, ZNF584, PDP2, ZC3HAV1, PTGS2, PLEKHM1, LNX2, MMP3, MMP1, ZNF828, GTF2E1, ZNF302, NUDT12, RREB1, ZNF814, ZNF189, TRERF1, ZNF234, ZNF789, ZGLP1, ZNF239, ADAMTS1, ZNF844, ELAC1, ZC3H4, ZSCAN5A, SFXN2, DIDO1, ZNF616, ZNF226, SLC30A1, ZNF697, DMD, B3GNT1, ZNF425, THAP10, KLF5, KLF6, ZBTB47, ZMYM2, KLF7, KLF10, KLF11, ZMYM5, IREB2, ZBTB43, DDX58, CBLB, CYP2R1, HIVEP1, TCF19, ABL2, KLF4, RAI1, Z…	336	2785	12983	1.5400455244934599	3.343701858444792E-4	6.688298323742625E-5	9.533455443744288E-4
GOTERM_MF_FAT	GO:0016564~transcription repressor activity	26	4.961832061068702	6.699525498409697E-7	E2F7, CBX4, MXI1, CBFA2T2, HOXC6, HOXC8, HEXIM1, HOXA7, BCL11A, BHLHE40, SKIL, NFIL3, SIK1, BCOR, TBX3, MXD1, PURB, DDIT3, NRIP1, HIPK2, ZGLP1, MNT, TGIF1, HIVEP1, ID3, KLF4	336	316	12983	3.1792307112718503	3.389386511085668E-4	5.6497754574280634E-5	9.663731510234363E-4
GOTERM_MF_FAT	GO:0008134~transcription factor binding	34	6.488549618320611	1.2570029282188282E-6	E2F2, CRTC1, CBX4, FHL2, MXI1, CBFA2T2, TRIB1, HOXC6, BCL11A, SKIL, NFIL3, NRG1, RUNX1, BCOR, SERTAD2, PITX2, KLF7, CFB, NLK, MXD1, TRERF1, PURB, DDIT3, AHR, PPARGC1B, NRIP1, PURA, ABT1, BTG1, JUN, HIPK2, MNT, TGIF1, ID3	336	513	12983	2.5609277824190104	6.358416483878138E-4	9.085928367646989E-5	0.0018131569082036059
GOTERM_MF_FAT	GO:0003714~transcription corepressor activity	15	2.8625954198473282	2.2837854664243733E-5	CBX4, MXI1, MXD1, CBFA2T2, DDIT3, NRIP1, HOXC6, HIPK2, BCL11A, MNT, TGIF1, ID3, SKIL, NFIL3, BCOR	336	145	12983	3.9972290640394093	0.011489571316719793	0.0014434679987875842	0.03293756542149806
GOTERM_MF_FAT	GO:0003712~transcription cofactor activity	24	4.580152671755725	6.901013105473308E-5	KLF7, CRTC1, CBX4, FHL2, MXI1, MXD1, TRERF1, CBFA2T2, DDIT3, PPARGC1B, NRIP1, HOXC6, ABT1, BTG1, HIPK2, BCL11A, MNT, TGIF1, ID3, SKIL, BCOR, NRG1, NFIL3, SERTAD2	336	363	12983	2.554702872884691	0.03431765210712723	0.0038725191894202204	0.09949802380437855
