# Supplementary material for: Additive Effects of Millimeter Waves and 2-Deoxyglucose Co-Exposure on the Human Keratinocyte Transcriptome
Source: PLoS One. 2016 Aug 16;11(8):e0160810. doi: 10.1371/journal.pone.0160810 (PMC4986955; doi:10.1371/journal.pone.0160810)
Supplement: S5 Table — (XLS) [file pone.0160810.s006.xls]

## Sheet: CC
Category	Term	Count	%	PValue	Genes	List Total	Pop Hits	Pop Total	Fold Enrichment	Bonferroni	Benjamini	FDR
GOTERM_CC_FAT	GO:0031981~nuclear lumen	61	11.641221374045802	9.540477151795079E-8	BACH1, E2F2, FOSL2, E2F7, FOXO1, DGCR14, PNN, CCNE2, GTF2E1, RPP30, H2AFX, PITX2, RREB1, PPARGC1B, NRIP1, PCF11, ADRB2, HUWE1, ABT1, CFL2, JUN, HIPK2, ARL4A, STON2, UTP3, ING5, ING3, HIST1H4L, NFKBIE, C14ORF169, MYBL1, NFYA, IVNS1ABP, SOX9, ZNF174, TSPYL2, SQSTM1, GATAD2B, GEMIN6, PHLDA1, ZBTB7B, ZMYM2, CEBPB, POLR3H, TBX3, PPAN-P2RY11, SMAD7, NLK, HNRNPA1, ZBTB43, CDC25A, PHF17, DUSP4, DNAJB9, P…	266	1450	12782	2.021524500907441	2.8621023234198795E-5	2.8621023234198795E-5	1.274895265468423E-4
GOTERM_CC_FAT	GO:0031974~membrane-enclosed lumen	72	13.740458015267176	1.0563180531608432E-7	BACH1, E2F2, FOSL2, PDP2, PTGS2, E2F7, FOXO1, DGCR14, PNN, CCNE2, GTF2E1, DDX28, PTGES, RPP30, H2AFX, PITX2, RREB1, PPARGC1B, NRIP1, PCF11, ADRB2, HUWE1, ABT1, CFL2, JUN, HIPK2, VEGFA, ARL4A, ING5, STON2, UTP3, HIST1H4L, ING3, NFKBIE, C14ORF169, MYBL1, NFYA, IVNS1ABP, SOX9, ZNF174, TSPYL2, PARS2, SQSTM1, GATAD2B, GEMIN6, BDH1, PHLDA1, ZBTB7B, TXNIP, ZMYM2, CEBPB, POLR3H, TBX3, PPAN-P2RY11, SMAD7,…	266	1856	12782	1.8641107078039927	3.168904115624649E-5	1.5844646104490323E-5	1.4115591683294682E-4
GOTERM_CC_FAT	GO:0070013~intracellular organelle lumen	68	12.977099236641221	4.952714715412689E-7	BACH1, E2F2, FOSL2, PDP2, PTGS2, E2F7, FOXO1, DGCR14, PNN, CCNE2, GTF2E1, DDX28, RPP30, H2AFX, PITX2, RREB1, PPARGC1B, NRIP1, PCF11, ADRB2, HUWE1, ABT1, CFL2, JUN, HIPK2, ARL4A, ING5, STON2, UTP3, HIST1H4L, ING3, NFKBIE, C14ORF169, MYBL1, NFYA, IVNS1ABP, SOX9, ZNF174, TSPYL2, PARS2, SQSTM1, GATAD2B, GEMIN6, BDH1, PHLDA1, ZBTB7B, ZMYM2, CEBPB, POLR3H, TBX3, PPAN-P2RY11, SMAD7, NLK, MRPS25, HNRNPA1…	266	1779	12782	1.8367503920002366	1.4857044056326707E-4	4.9525932965255315E-5	6.618303081795673E-4
GOTERM_CC_FAT	GO:0043233~organelle lumen	69	13.16793893129771	5.307277513152032E-7	BACH1, E2F2, FOSL2, PDP2, PTGS2, E2F7, FOXO1, DGCR14, PNN, CCNE2, GTF2E1, DDX28, RPP30, H2AFX, PITX2, RREB1, PPARGC1B, NRIP1, PCF11, ADRB2, HUWE1, ABT1, CFL2, JUN, HIPK2, VEGFA, ARL4A, ING5, STON2, UTP3, HIST1H4L, ING3, NFKBIE, C14ORF169, MYBL1, NFYA, IVNS1ABP, SOX9, ZNF174, TSPYL2, PARS2, SQSTM1, GATAD2B, GEMIN6, BDH1, PHLDA1, ZBTB7B, ZMYM2, CEBPB, POLR3H, TBX3, PPAN-P2RY11, SMAD7, NLK, MRPS25, …	266	1820	12782	1.8217755928282244	1.5920569306981935E-4	3.980379971812997E-5	7.092103107675385E-4
GOTERM_CC_FAT	GO:0043232~intracellular non-membrane-bounded organelle	81	15.458015267175574	7.598151605583422E-5	BACH1, FOSL2, CEP76, CBX4, DGCR14, GTSE1, PNN, DDX28, MC1R, CEP250, TIGD2, RPP30, H2AFX, HIST1H1A, HMGA2, PURB, PURA, KRT19, ADRB2, HUWE1, ABT1, CGN, CFL2, JUN, HIPK2, TBCC, FILIP1L, ARL4A, STON2, UTP3, SDCCAG8, HIST1H4L, HMGB3, NDN, SSH1, NFKBIE, RPL27A, STK17B, NEDD9, C14ORF169, FHL2, MYBL1, IVNS1ABP, SOX9, NUFIP2, ZNF174, SPC25, TSPYL2, CENPBD1, DMD, MRPL19, SKA3, GATAD2B, NDRG1, PHLDA1, ZBTB7…	266	2596	12782	1.4993309545049065	0.02253747048979282	0.004548687410226515	0.10148658865319904
GOTERM_CC_FAT	GO:0043228~non-membrane-bounded organelle	81	15.458015267175574	7.598151605583422E-5	BACH1, FOSL2, CEP76, CBX4, DGCR14, GTSE1, PNN, DDX28, MC1R, CEP250, TIGD2, RPP30, H2AFX, HIST1H1A, HMGA2, PURB, PURA, KRT19, ADRB2, HUWE1, ABT1, CGN, CFL2, JUN, HIPK2, TBCC, FILIP1L, ARL4A, STON2, UTP3, SDCCAG8, HIST1H4L, HMGB3, NDN, SSH1, NFKBIE, RPL27A, STK17B, NEDD9, C14ORF169, FHL2, MYBL1, IVNS1ABP, SOX9, NUFIP2, ZNF174, SPC25, TSPYL2, CENPBD1, DMD, MRPL19, SKA3, GATAD2B, NDRG1, PHLDA1, ZBTB7…	266	2596	12782	1.4993309545049065	0.02253747048979282	0.004548687410226515	0.10148658865319904
